1 **A versatile bulk electrotransfection protocol for mouse embryonic fibroblast and iPS**  
2 **cells**

3 Shahin Eghbalsaied<sup>1,2\*</sup>, Iqbal Hyder<sup>1</sup>, Wilfried A. Kues<sup>1</sup>

4 <sup>1</sup>Institute of Farm Animal Genetics, Friedrich-Loeffler-Institut (FLI), Mariensee, Neustadt am  
5 Rübenberge, Germany

6 <sup>2</sup>Department of Animal Science, Isfahan (Khorasgan) branch, Islamic Azad University, Iran.

7 \*Corresponding author: [Shahin.eghbalsaied@fli.de](mailto:Shahin.eghbalsaied@fli.de) , [Shahin.eghbal@khuisf.ac.ir](mailto:Shahin.eghbal@khuisf.ac.ir)

8 Institute of Farm Animal Genetics, Friedrich-Loeffler-Institut (FLI), Mariensee, Neustadt am  
9 Rübenberge, Germany.

10 **Postal address:** Höltystr. 10, 31535 Neustadt am Rübenberge, Germany.

11 **Telephone:** +49 5034 871 5120

12 **Fax:** +49 5034 871 5101

13

14

15

## 16    **Abstract**

17    A square-wave pulsing protocol was developed using OptiMEM-GlutaMAX for high efficient  
 18    transfection of mouse embryonic fibroblast and induced pluripotency stem cells. The protocol was  
 19    very efficient for plasmid size ranging from 6.2 to 13.5 kb. Electroporated MFP488-labeled  
 20    oligonucleotides were detected only in the cell cytoplasm, while the onset of transgene expression was  
 21    during the first 4 h post-electroporation. A high rate of Venus KO cells was produced using indels as  
 22    well as targeted deletion by electrotransfection of CRISPR/Cas9 plasmids. In conclusion, this plasmid  
 23    electrotransfection protocol is straight-forward, cost-effective, and efficient for CRISPRing mouse  
 24    primary cells.

25    **Keywords:** CRISPR/Cas9, Electrotransfection, Targeted deletion, Large plasmids, OptiMEM-  
 26    GlutaMAX

27

## 28     **Background**

29     The CRISPR (clustered regularly interspaced short palindromic repeats)–Cas9 (CRISPR-  
30     associated 9) nuclease system is a straight-forward, versatile, highly efficient, and nascent tool  
31     for genome editing of various organisms. Using ‘all-in-one’ expression vectors containing  
32     expression cassettes for guide RNAs and Cas9 nuclease/nickase it is possible to conduct  
33     CRISPR/Cas9 studies through a low-cost and straight-forward approach (1). However, the  
34     efficiency of gene editing using plasmid-based delivery methods remains relatively low,  
35     which subsequently increased attentions toward using alternate methods of employing the  
36     Cas9 protein and/or guideRNAs and using Ribonucleoproteins (RNPs) (2, 3).

37     Basically, gene transfer into cells is taking place via electroporation, lipofection, or viral  
38     transduction. Although viral gene transfer is very efficient, it requires time, skilled staff, and  
39     high levels of safety issues, whereas it has a limitation in the insert size and more importantly  
40     enhanced risks for clinical researches/cases (4). On the other side, lipofection suffers from a  
41     low efficiency. Electroporation is an approach to instantly create several pores in the cell  
42     membrane using a burst electric pulse and to mediate the transfer of micro- and macro-  
43     molecules into cells, embryos, tissues, and organs (5). From the early papers on  
44     electroporation (6), it has been evident that gene transfer via electroporation is simple, easily  
45     applicable, and also efficient compared to lipofection (6). Although electroporation has been  
46     widely accepted as the main gene transfer tool in various laboratories around the world, the  
47     underlying mechanism has not been completely understood (7). Therefore, optimization of  
48     various factors, such as the electroporation medium, cuvette type (path width, length, and  
49     high), as well as the pulsing method which includes the amount, number, duration, and  
50     interval of pulses, is needed to have a high electrotransfection efficiency particularly in  
51     primary cells. Based on the above-mentioned electroporation parameters various types of  
52     electroporation-based devices, such as nucleofection (8), nano-electroporation (9),

mechanical-electrical approach (7), and microfluidic membrane deformation (2) as well as new generation of electroporator devices (10), have been invented. However, still there is a huge room to improve the electroporation efficiency to transfer exogenous DNAs into cells, specifically for large plasmids (7, 11).

Here, we introduced a highly efficient electrotransfection method for both mouse embryonic fibroblast (MEF) and induced pluripotent stem (iPS) cells based on the square-wave pulsing method using a Bio-Rad electroporation device, which is routinely available in almost all of cell culture labs. We developed the technology using different types of reporter plasmids and confirmed its very high efficiency for making gene knockout induced by both indels and targeted deletions using single or double gRNAs through CRISPR/Cas9 plasmids, respectively.

## **Results**

### **Optimization of electrotransfection protocol for mouse iPS and EF cells**

Three available media which are easily accessible in every cell culture lab were compared for transfection efficiency. Initial results of transfection of mouse iPS cells with Bio-Rad electroporation buffer, PBS, and OptiMEM-GlutaMAX using a 10 ms single pulse of 200 V resulted in 84.7 % transfection rate in OptiMEM-GlutaMAX medium compared to 17.9 % in Bio-Rad buffer (Figure S1). More importantly, the number of cells and colonies 24 h after the electroporation was considerably higher in OptiMEM-GlutaMAX compared to both Bio-Rad and PBS buffers ( $p < 0.05$ ).

Then, we optimized pulse voltage, number, and duration as well as the medium temperature for electrotransfection of iPS cells based on the OptiMEM-GlutaMAX medium (Figures S2). We developed an electroporation protocol using the square-wave pulsing program, 250 V, 2

pulses, each 10 ms length, and 10 s interval in 4 mm cuvettes. Electroporations were carried out at room temperature with 20 µg DNA in 250 µl of OptiMEM-GlutaMAX. Applying this protocol for transient expression of mCherry and Venus reporters in mouse iPS cells showed a 95.5 and 92.8 % electrotransfection efficiency, respectively (Figure 1). Then, we implemented the same protocol with a higher voltage (300 V instead of 250 V) for MEF cells and reached 96.0 and 95.1 % expression of mCherry and Venus transgenes, respectively, 24 h after the electroporation (Figure 1). The electrotransfection efficiency was reproducible using mCherry reporter in three MEF and three iPS cell lines which carried no-copy, single-copy, or two-copy of Venus transgene as well as MEF and iPS cell lines which carried no-copy of Venus. Finally, using the optimized electrotransfection protocol the transient transfection efficiency of mouse iPS and EF cells was assessed in 250 µl of either of Bio-Rad, OptiMEM-GlutaMAX, and PBS media (Figure 2). Viability of iPS cells was significantly lower in Bio-Rad (22.0 %) and PBS (3.2 %) compared to the OptiMEM-GlutaMAX medium (78.2 %). Also, the electrotransfection efficiency of iPS cells was more than two-fold in OptiMEM-GlutaMAX (99.3 %) than that of Bio-Rad (42.7 %) and PBS media (47.2 %). The electrotransfection efficiency of mouse EF cells was 30 % higher in OptiMEM-GlutaMAX compared to the Bio-Rad medium (p-value <0.05). In addition, the viability of mouse EF cells averaged 78 % in the OptiMEM-GlutaMAX group.

# **Electroporation of labelled-DNA showed the transgene transfer into the cell cytoplasm**

Expression of Venus-encoding plasmid was observed since the first hour after the electrotransfection (Figure 3). The expression rate increased from 63 to 76 % during the first 4 h and then gradually increased to 95 % till 24 h following the transfection. Venus expression was not detected during the first 4 h following the lipofection. The transgene expression was started 6 h following the lipofection and maximized 48 h post lipofection.

We were interested in finding if the transgene is transferred into the cell nucleus throughout the electrotransfection process. Labelled-oligonucleotides were electroporated into the MEF cells using the optimized protocol. Cells were observed from 4 h to 24 h post-electroporation. Tracking of the labelled-oligonucleotides showed their presence in the cytoplasm (Figure 4).

### **Efficient knockout of Venus transgene using indels by Cas9/gRNA encoding plasmids**

MEF cells carrying a single-copy of Venus transgene were transfected by plasmids encoding a gRNA and Cas9 protein using the optimized electroporation method (Figure S3). Venus expression was not reduced by three gRNAs which targeted the upstream region of the Venus transgene although they induced indels in the targeted sites (Figure 5). However, targeting the beginning and ending parts of the transgene, ranging from +36 to +554 bp of the cDNA, could knockout the transgene in > 90 % of the electroporated cells (Figure S3). The Venus KO efficiency was maximized using gRNA+100 which was complimentary to the beginning part of the cDNA, so that only 2 % of cells maintained the functional Venus. The KO results were confirmed by fluorescent microscope as well as FACS analysis and DNA sequencing. The KO efficiency of Venus transgene was not affected by the puromycin treatment; 99 % vs. 93 % for 100 gRNA with and without puromycin selection, respectively (Figure S4). Although electrotransfection results were very promising using OptiMEM-GlutaMAX medium, substituting the medium with the standard OptiMEM supplemented with glutamine was completely inefficient for making Venus KO (Figure S5). Moreover, electrotransfection of MEF cells with pSGD-Lys-72 plasmid (13.5 kb) encoding human lysozyme, puromycin, and gRNA-72 comparing to the modified pX459-gRNA-72 showed a similar cell viability following a one-day selection against puromycin antibiotic (Figure S6).

### **High efficient deletion of Venus fragments using dual gRNAs**

Following making KO Venus using indels, we were interested in testing the efficiency of the electrotransfection protocol for making deletions inside of the target gene using two gRNAs.

Simultaneously, MEF cells carrying a single-copy of Venus were co-electroporated using combination of double gRNAs. The result of end-point PCR showed deletion of expected fragments ranging from 398 to 748 bp in the Venus transgene using all of gRNAs pairs (Figure 6). Only shortened Venus amplicons were amplified by a primer set (Figure S7), while using another primer set the original transgene with no deletion was also detectable (Figure 6). In overall, the deletion efficiency was more evident using the combinations of gRNA+676, although gRNA+554 and +518 were also efficient for making deletions. Results of the DNA sequencing confirmed the fragment deletion in co-transfected groups (Figure S8).

## Discussion

Nowadays, implementation of the nascent CRISPR/Cas9 technology is a straightforward approach to make genetic engineering in any organism. On the other hand, electroporation of large plasmids (> 6 kb) is almost inefficient and associating with a low viability in primary cells (11). In the current study, we identified OptiMEM-GlutaMAX as the best medium for electroporation of MEF and iPS cells. The electrotransfection efficiencies were quite high throughout the initial setup condition with various pulsing conditions. A > 95 % electrotransfection rate was achieved with the optimized pulsing condition. Even the rate of transient expression of reporter genes as well as the cell viability using the OptiMEM-GlutaMAX in the current study were as high as that of newly reported mechanical-electrical (7) and nanopore-electrical approaches (12). We used plasmids with various sizes, from 6.2 to 13.5 kb, and found a high transfection rate and cell viability irrespective of the plasmid size. It has been evident that electrotransfer of large plasmids (> 6 kb) associates with a very high cell toxicity, while the cell transfection rate is also low (11). However, in our study, electrotransfection of MEF cells using a 13.5 kb was as efficient as a 9.2 kb plasmid, whereas the cell viability remained the same. Therefore, the electrotransfection protocol for primary

cells in the current study could overcome impediments of hard to transfect cells, as well as high toxicity, and low transfection rate using large plasmids (11). So far, invention of minicircles was considered as the main solution to overcome this problem (13). However, converting a plasmid to a minicircle is time- and cost-consuming and it does not solve the problem of co-transfection of plasmids (11). Nonetheless, our results showed that electrotransfection of large plasmids is possible with a high efficiency and cell viability in OptiMEM-GlutaMAX medium with no need for a long post-pulse recovery time suggested by Lesueur et al. (11). It has been well-documented that iPS cells are resistant and vulnerable to electroporation (14). The current study showed that comparing to the Bio-Rad electroporation buffer, the OptiMEM-GlutaMAX was compatible with iPS cells in terms of transfection rate and cell viability. However, unlike reported by Potter et al. (15), conducting the electroporation in ice-cold medium did not improve the transfection efficiency in the current study, although the transfection efficiency of ice-cold medium was almost independent of pulsing condition.

Unlike lipofection group, the onset of transgene expression in a major fraction of MEF cells was at the early time (1-4 h) following the electrotransfection. The result of expression time of electrotransfected DNA from the current study completely agreed with those using nucleofection approach for bulk-cell transfection (4) as well as the mechanical and electrical approach for single-cell membrane disruption (7). It has been supposed that active transfer of DNA into the nucleus is necessary for gene expression, otherwise cytosolic presence of exogenous DNA leads to DNA degradation with no efficient expression (7). Therefore, we were interested to see the transgene location in the electrotransfected cells using the OptiMEM-GlutaMAX medium. Localization of labelled-oligonucleotides during a period of 4-24 h following the electrotransfection process showed that exogenous DNA presented only in the cell cytoplasm, rather than plasma membranes using mechanical-electrical approach



(7). Although the transcription site of genomic DNA is strictly in the nucleus, transcriptional process of exogenous DNAs has not been elucidated in eukaryotic cells. Tracking of labelled-DNA in calcium phosphate transfected cells showed that the fluorescent label was mainly detected in the cell cytoplasm (16). Nonetheless, correspondence of low transfection efficiency (< 5%) with the rare detection of exogenous DNA in the cell nucleus (< 1%) (16) as well as higher transfection rate using direct microinjection of exogenous DNA into the cell nucleus (17) highlighted this idea that transfer of exogenous DNA from cytoplasm to nucleus is a requisite for cell transfection (7, 16, 17). However, high transfection rate of primary cells in the current study with no detection of the labeled-DNA in the cell nucleus does not pinpoint the nucleus as the only transcription site for exogenous DNA. On the other side, neither nucleus transmission of exogenous DNA through electroporation nor lack of its cytosolic transcription have been well-documented. The assembly and presence of RNA polymerase II which involved in mRNA transcription has been shown in both cytosolic and nuclear fractions of mammalian cells (18, 19). Cytosolic presence and activity of RNA polymerase III for transcription of exogenous DNA has been detected (20, 21). Also, it has been recently evidenced that mRNAs can be transcribed from plasmids in yeast cytoplasm (22). Although cytosolic expression of mRNA from exogenous DNA has not been explored, the current study provided evidences which indicate cytosolic presence of the transgene may be enough for the transgene expression. This includes lack of evidence of the transgene localization to the cell nucleus, transgene expression in a major fraction of electrotransfected cells following 1 h from the onset of electrotransfection, and efficient electrotransfection of large plasmids, which are hard to pass through the nucleus membrane (11).

Then, we were interested to know if the transient expression is sufficient for genome engineering using the CRISPR/Cas9 technology. Following optimization of the electrotransfection protocol for reporter-encoding transgenes, we implemented the same

protocol for transfer of plasmids encoding Cas9 and gRNA aiming to knockout the Venus transgene in MEF cells carrying a single-copy of Venus. The highest rate of Venus knockout through indels formation (> 95 % using gRNA+100) was as high as the electrotransfection efficiency of reporter-encoding plasmids. The indels rate using plasmids in the current study was higher than reported results by using both plasmid and RNP electrotransfection(23-25). Following making KO Venus using indels, we were interested to test the efficiency of the electrotransfection protocol for making deletions inside of the target gene using double gRNAs. Deletion of expected fragments in the Venus transgene by co-electroporation of two plasmids encoding two different gRNAs was confirmed using endpoint-PCR as well DNA sequencing. The deletion efficiency obtained in the current study is higher than previous results using dual gRNAs and Cas9 protein (26) as well as Cas9-encoding plasmids using BTX medium in mouse cell lines (27).

## Conclusion

In this study, we introduced a highly efficient electrotransfection method for both MEF and iPS cells based on the square-wave pulsing method using OptiMEM-GlutaMAX medium. This plasmid-based delivery method could induce > 95 % transfection efficiency for fluorescent reporter genes. Tracking of the labelled-DNA in the electrotransfected cells showed that the fluorescent label was detected only in the cell cytoplasm. However, the onset of transgene expression occurred during 1-4 h following the electrotransfection. Electrotransfection of Cas9/gRNA encoding plasmids caused to > 98 % Venus knockout. Apart from indels creation, targeted deletions in the Venus transgene were achieved using the co-electroporation of two gRNA-encoding plasmids. Therefore, the developed protocol in the current study can be an alternate to using Cas9 protein and RNPs.

## Materials and methods

## Materials

All plastic consumables including cell culture flasks and plates, tubes, and filter tips have been purchased from SARSTEDT AG & Co. (Germany). Chemical reagents were purchased with the following information: Dulbecco's Phosphate Buffered Saline without calcium chloride and magnesium chloride (#D6662-10X1L, SIGMA-ALDRICH, Germany); Opti-MEM 1X + GlutaMAX, reduced serum medium (#1854076, Gibco, Life Technologies, Germany); DMEM High Glucose (4.5 g/l) w/o L-glutamine (#DMEM-HXA, Capricorn Scientific GmbH, Germany); L-glutamine for cell culture (#A3704,0100, Applichem, Germany); MEM nonessential amino acids solution (100X) (#NEAA-B, Capricorn Scientific GmbH, Germany); 2-mercaptoethanol (#BCBS5481, SIGMA-ALDRICH, Germany); penicillin/streptomycin solution (100x) (#PS-B, Capricorn Scientific GmbH, Germany); Trypsin-EDTA (10X) (#L11-003, GE Healthcare, PPA Laboratories GmbH, Austria); fetal bovine serum (#10270-106, Gibco, ThermoFisherScientific, Germany); dimethyl sulfoxide (#D4540-500ML, SIGMA-ALDRICH, Germany); LIF (hBA-FL) (#sc-4377, Santa Cruz Biotechnology, Germany); sodium pyruvate (#P2256, SIGMA-ALDRICH, Germany); gelatin from bovine skin (#G939-100G, SIGMA-ALDRICH, Germany); and Hoechst 33258 (#62249, Thermo Scientific, Germany). The Gene Pulser Xcell™ system with CE Module from BIO-RAD (Germany) was used with 4 mm electroporation cuvettes (#748052, Biozym, Germany).

## Plasmids

### Plasmids carrying *Sleeping Beauty* (SB) system

The *Sleeping Beauty* transposase was encoded from pCMV-T7\_SB100X (4756 bp) which contains the hyperactive variant 100 of SB under the CMV promoter (28). Two reporter plasmids, pT2-Venus (6301 bp) encoding the Venus fluorescent marker under CAGGS promoter and pT2-mCherry (7756 bp) encoding mCherry, were used (28). In addition, a 13.5

kb plasmid, pSGD-Lys-72, was also used as a large plasmid which encodes human lysozyme under CAGGS promoter followed and Cas9 proteins which was separated from puromycin by a T2A peptide and expressed under CMV promoter, and gRNA-72 under U6 promoter. All pT2-Venus, pT2-mCherry, and pSGD-Lys-72 plasmids contained inverted terminal repeats (ITRs) of the SB transposase. The SB reprogramming transposon involved a CAGGS promoter driven cassette containing Oct4, Sox2, Klf4, and c-Myc, which were separated by sequences for coding the self-cleaving 2A peptides, and flanked by SB-ITRs (29).

### **Plasmid carrying the CRISPR/Cas9 system**

For the CRISPR/Cas9 study, we modified pX459 plasmid (9151 bp) which encodes a Cas9 protein followed by puromycin antibiotic under CAGGS promoter/enhancer, as well as the gRNA scaffold under the U6 promoter. All gRNAs were synthesized and cloned into the backbone vector based on the Franham protocol (30). Briefly, gRNAs were selected to target Venus promoter or open reading frame (ORF) via CRISPOR software, available online (<http://crispor.tefor.net/>) (31). The list of gRNAs is available in Table 1. The 100  $\mu$ M forward and reverse oligos were annealed in 10  $\mu$ l reaction volume by incubation in a water bath containing pre-boiled water and letting it to cool down to the room temperature. The pX459 plasmid was digested with High Fidelity BbsI-HF (NEB #R3539) at 37°C for 10 min followed by gel purification using NucleoSpin Gel and PCR Clean-up Midi kit (#740986.20, MACHEREY/NAGEL). The purified fragment was kept at -20°C for further applications. Ligation of the annealed oligo-duplex with the digested pX459 was carried out as follow: diluted oligo-duplex (1:20 ratio from the 10  $\mu$ M source) (1  $\mu$ l), digested pX459 vector (50 ng), 10 $\times$  T4 DNA ligase buffer (2  $\mu$ l), and T4 DNA ligase (1  $\mu$ l) in a 20  $\mu$ l final reaction. The ligation reaction was incubated at room temperature for 1 hour. Transfection of the ligation mixture was carried out into NEB 5-alpha Competent E. coli (Cat. # C2987I) following incubation of 10  $\mu$ l of the ligation reaction with the thawed competent cells on ice for 20 min and then at 37°C for 5 min. Then, 400  $\mu$ l of SOC medium was added into the transformation

tube, incubated at 37° C for 30 min, plated on Agar plates supplemented with 100 µg/ml ampicillin, and incubated overnight at 37°C. From the cultured plate, 10 colonies were picked and each was cultured in a 3 ml LB medium followed by miniprep plasmid extraction (Genejet Plasmid miniPrep kit, #K0502). The extracted plasmids were simultaneously digested by BbsI and EcoRV FastDigest restriction enzymes (Fermentas). Plasmids with the expected bands of 6244 and 2928 bp were sent for sequencing.

## **Cell culture and electroporation**

### **Gelatinization of cell culture plates**

A 0.1 % gelatin solution was prepared by stirring 250 ml PBS and 2.5 g gelatin for one hour without heating, and the solution was then autoclaved. Five milliliter of the 0.1 % gelatin was poured into a 6-well plate and aspirated after 1 min. Plates were left to be dried under the laminar flow hood for 30 min.

### **Cell lines**

We used mouse embryonic fibroblast cells (MEFs), carrying either no- or a single-copy of the Venus transgene (Venus +/-). Mouse embryonic fibroblast cells were isolated from day 11 embryos of the Venus -/- (wild type) or Venus +/- embryos . Embryos were beheaded, sliced, and cultivated with 5 ml fibroblast medium (DMEM with 10% FBS, L-glutamine, penicillin-streptomycin, nonessential amino acids, and β-mercaptoethanol) in T75 flasks. After 3 days of the incubation, propagated cells were trypsinized, passaged, and used for cell culture and transfection. Moreover, mouse iPS cells were derived from MEFs with no- or a single-copy of the Venus, respectively (29). Briefly, MEFs were electroporated with plasmids containing the 4-factor reprogramming transposon and the helper plasmid containing the hyperactive SB transposase (29). Electroporated cells were cultured in gelatinized 6-well plates and iPS medium. Presumptive iPS colonies were picked under microscope, and plated into individual

wells of 96-well plates containing trypsin. Trypsin was neutralized with DMEM and 10% FCS, and the cells suspension was dispensed into individual wells of gelatinized 96-well plates (29).

## **Cell Electroporation**

To assess the transfection efficiency using reporter plasmids, MEFs and iPS cells with no-copy of Venus reporter were used. Both MEFs and iPS cells were cultured in 6-well plates. From the highly confluent culture, cells from each well of a 6-well plate were used for each electroporation reaction using both iPS and MEFs cells. Cells were washed once with 2 ml PBS and then trypsinized with 200  $\mu$ l trypsin-EDTA. Trypsin activity was inhibited by 4 ml PBS per well, and then was removed through centrifugation at 1,000 rpm for 3 min. The cell pellet was resuspended into 250  $\mu$ l of the electroporation medium. In an initial experiment, the highest transfection efficiency of iPS cells were reached by OptiMEM-GlutaMAX medium (Supplementary Figure 1). Then, the effect of voltage and medium temperature was optimized for iPS cells (Supplementary Figure 2 and 3). Finally, we reached the following optimized condition for electroporation of mouse iPS cells. Twenty micrograms of plasmid DNA were mixed with cells, and the cell-plasmid mixture was transferred into the 4 mm cuvettes, and underwent the following electroporation program: The square-wave protocol with 250 V, each 10 ms pulse length, 2 pulses, and 10 s pulse interval. MEFs underwent the same electroporation program which was optimized for iPS cells, except conduction of a 300 V. After the electroporation process, cells were transferred into the culture medium in 6-well plates and incubated at 37°C and 5 % CO<sub>2</sub>.

## **Assessing the position and expression time of electroporated DNA**

A 25 nt oligonucleotide was labelled using Label-IT nucleic acid labelling kit, MFP488 (#MIR3125, Mirus, USA), electroporated into MEF cells carrying no-copy of Venus based on

the optimized protocol, and tracked in the electrotransfected cells for a period of 4 to 24 h. Moreover, the expression of Venus transgene was assessed in a timeframe of 1 to 24 h following the electroporation. In comparison, lipofection of MEF cells using TransIT transfection reagent based on the producer protocol (Mirus, USA). Briefly, 7.5  $\mu$ l of TransIT was dissolved in 250  $\mu$ l OptiMEM-GlutaMAX medium and incubated at room temperature for 10 min. Then, 2.5  $\mu$ g of pT2-Venus was added to the liposomes and the incubation was continued for 30 min. The TransIT-DNA lipoplex was added to  $0.5 \times 10^5$  cells in 2.5 ml culture media, and Venus expression was assessed in parallel with the electroporation group at 1, 2, 3, 4, 6, 12, and 24 h post-transfection.

### **Making Venus knockout using one and two gRNAs**

For the CRISPR/Cas9 experiment, we used MEFs cells with a single-copy of Venus for making KO-Venus cells. The above-mentioned optimized protocol for cell electrotransfection was also used for Cas9/gRNA encoding plasmids. Knockout of Venus was carried out either by indels using 20  $\mu$ g of a modified pX459 plasmid or by deletions via co-electroporation of two modified pX459 plasmids (each 20  $\mu$ g per reaction). To consider the deletion efficiency of various sizes, three gRNAs which target the late part of Venus transgene (gRNA +518, +554, and +676) were pair-wisely co-electroporated with five gRNAs which targeted the early part of Venus (gRNA -72, -69, +36, +100, and +121). A pair of primers which cover all the gRNA complementary sites were used for the end-point PCR. Moreover, a primer-probe assay was designed and synthesized by IDT (Integrated DNA Technologies, USA). DNA was extracted from each treated group using salting-out method. Briefly, confluent cells in each well of 6-well plates were trypsinized with 250  $\mu$ l Trypsin-EDTA, directly transferred into a 1.5 ml tube containing 1 ml of cell lysis buffer (0.2 mg/ml proteinase K, 150 mM NaCl, 10 mM Tris, 10 mM EDTA, and 0.1% sodium dodecyl sulfate (SDS)) (32), and were incubated overnight at 55 °C in a shaker-incubator. Then, 500  $\mu$ l saturated NaCl was added into each

tube, converted for 5-10 times, and centrifuged with the high speed at room temperature. Supernatants were transferred into two new tubes and underwent ethanol precipitation with absolute ethanol followed by twice washing with 70 % ethanol using centrifugation with the high speed at 4°C. The DNA pellet was dissolved in 200 µl distilled water and kept at -20 °C till further usages.

### **Fluorescent microscope imaging and flow cytometry analysis**

For the fluorescent imaging, cells in each well of 6-wll plate were washed once with PBS, the medium was replaced with the transparent OptiMEM (without phenol) supplemented with Hoechst 33258 (2: 10,000 ratio from 1 mg/ml stock solution), and incubated at 37°C for 30 min. Transfection efficiency for mCherry and Venus reporters were assessed either by FACS machine or fluorescent microscope, whereas the location of labelled-oligonucleotide was assessed only by the fluorescent microscope. Cell viability was defined as cell numbers in the electroporated group divided by the cell number in the 0 voltage group (negative control). Knockout efficiency of various gRNA sequences targeting the Venus reporter was assessed 10 days after the electroporation. A flow cytometer, MACSQuant® Analyzer, was also used to assess cell transfection rate. We used Blue 488 nm in B1 channel with 525/550 nm filter and Yellow 461 nm Y2 channel with 615/20 nm filter for detection of Venus and mCherry proteins, respectively.

### **Statistical analysis**

Means comparison was carried out using the least significant difference (LSD) test (p-values 0.05). All experiments were carried out at least three times.

### **Declarations**

### **Ethics approval and consent to participate**



The German animal welfare law does not require an approval for animal scarification aiming for organ biopsies. The number of scarified animals are annually reported to the regulating authorities.

# **Consent for publication**

Not applicable.

# **Availability of data and materials**

The datasets used and/or analysed during the current study are available from the corresponding author on reasonable request.

# **Competing interests**

Authors have no conflict of interest to declare.

# **Funding**

This project was funded by the grant number: Ref 3.4 - IRN - 1191261 - GF-E from the Alexander von Humboldt Foundation, Germany.

# **Author's contributions**

Conceived the idea and designed the experiment: SE and WK; Carried out the experiments: SE, IH, and WK; Wrote the manuscript: SE; all authors read and confirmed the manuscript content.

# **Acknowledgements**

Authors would like to thank Antje Frenzel for conducting the FACS analysis.

# **References**

1. Sakuma T, Nishikawa A, Kume S, Chayama K, Yamamoto T. Multiplex genome engineering in human cells using all-in-one CRISPR/Cas9 vector system. Scientific reports. 2014;4:5400.

2. Han X, Liu Z, chan Jo M, Zhang K, Li Y, Zeng Z, et al. CRISPR-Cas9 delivery to hard-to-transfect cells via membrane deformation. *Science advances*. 2015;1(7):e1500454.
3. Liu C, Zhang L, Liu H, Cheng K. Delivery strategies of the CRISPR-Cas9 gene-editing system for therapeutic applications. *Journal of controlled release*. 2017;266:17-26.
4. Gresch O, Engel FB, Nesic D, Tran TT, England HM, Hickman ES, et al. New non-viral method for gene transfer into primary cells. *Methods*. 2004;33(2):151-63.
5. Weaver JC, Smith KC, Esser AT, Son RS, Gowrishankar T. A brief overview of electroporation pulse strength–duration space: A region where additional intracellular effects are expected. *Bioelectrochemistry*. 2012;87:236-43.
6. Neumann E, Schaefer-Ridder M, Wang Y, Hofschneider P. Gene transfer into mouse lymphoma cells by electroporation in high electric fields. *The EMBO journal*. 1982;1(7):841-5.
7. Ding X, Stewart MP, Sharei A, Weaver JC, Langer RS, Jensen KF. High-throughput nuclear delivery and rapid expression of DNA via mechanical and electrical cell-membrane disruption. *Nature biomedical engineering*. 2017;1(3):0039.
8. Lakshmipathy U, Pelacho B, Sudo K, Linehan JL, Coucouvanis E, Kaufman DS, et al. Efficient transfection of embryonic and adult stem cells. *Stem cells*. 2004;22(4):531-43.
9. Yang Z, Chang L, Chiang C-I, James Lee L. Micro-/nano-electroporation for active gene delivery. *Current pharmaceutical design*. 2015;21(42):6081-8.
10. Kaneko T, Sakuma T, Yamamoto T, Mashimo T. Simple knockout by electroporation of engineered endonucleases into intact rat embryos. *Scientific reports*. 2014;4:6382.
11. Lesueur LL, Mir LM, André FM. Overcoming the specific toxicity of large plasmids electrotransfer in primary cells in vitro. *Molecular Therapy-Nucleic Acids*. 2016;5:e291.
12. Cao Y, Ma E, Cestellos-Blanco S, Zhang B, Qiu R, Su Y, et al. Nontoxic nanopore electroporation for effective intracellular delivery of biological macromolecules. *Proceedings of the National Academy of Sciences*. 2019;116(16):7899-904.
13. Joubert V, André FM, Schmeer M, Schleef M, Mir LM. Increased efficiency of minicircles versus plasmids under gene electrotransfer suboptimal conditions: an influence of the extracellular matrix. *Minicircle and Miniplasmid DNA Vectors: The Future of Nonviral and Viral Gene Transfer*. 2013:215-25.
14. Qian K, Huang CL, Chen H, Blackburn IV LW, Chen Y, Cao J, et al. A simple and efficient system for regulating gene expression in human pluripotent stem cells and derivatives. *Stem Cells*. 2014;32(5):1230-8.
15. Potter H, Heller R. Transfection by electroporation. *Current protocols in immunology*. 2017;117(1):10.5. 1-5. 9.
16. Loyter A, Scangos GA, Ruddle FH. Mechanisms of DNA uptake by mammalian cells: fate of exogenously added DNA monitored by the use of fluorescent dyes. *Proceedings of the National Academy of Sciences*. 1982;79(2):422-6.
17. Shen Y, Hirschhorn RR, Mercer WE, Surmacz E, Tsutsui Y, Soprano K, et al. Gene transfer: DNA microinjection compared with DNA transfection with a very high efficiency. *Molecular and cellular biology*. 1982;2(9):1145-54.
18. Boulon S, Pradet-Balade B, Verheggen C, Molle D, Boireau S, Georgieva M, et al. HSP90 and its R2TP/Prefoldin-like cochaperone are involved in the cytoplasmic assembly of RNA polymerase II. *Molecular cell*. 2010;39(6):912-24.
19. Huang V, Zheng J, Qi Z, Wang J, Place RF, Yu J, et al. Ago1 Interacts with RNA polymerase II and binds to the promoters of actively transcribed genes in human cancer cells. *PLoS genetics*. 2013;9(9):e1003821.
20. Chiu Y-H, MacMillan JB, Chen ZJ. RNA polymerase III detects cytosolic DNA and induces type I interferons through the RIG-I pathway. *Cell*. 2009;138(3):576-91.
21. Ablasser A, Bauernfeind F, Hartmann G, Latz E, Fitzgerald KA, Hornung V. RIG-I-dependent sensing of poly (dA: dT) through the induction of an RNA polymerase III–transcribed RNA intermediate. *Nature immunology*. 2009;10(10):1065.

22. Vopalensky V, Sykora M, Masek T, Pospisek M. Messenger RNAs transcribed from yeast linear cytoplasmic plasmids possess unconventional 5' and 3' UTRs and suggest a novel mechanism of translation. *BioRxiv*. 2018:325316.
23. Liang X, Potter J, Kumar S, Zou Y, Quintanilla R, Sridharan M, et al. Rapid and highly efficient mammalian cell engineering via Cas9 protein transfection. *Journal of biotechnology*. 2015;208:44-53.
24. Jacobi AM, Rettig GR, Turk R, Collingwood MA, Zeiner SA, Quadros RM, et al. Simplified CRISPR tools for efficient genome editing and streamlined protocols for their delivery into mammalian cells and mouse zygotes. *Methods*. 2017;121:16-28.
25. Liang X, Potter J, Kumar S, Ravinder N, Chesnut JD. Enhanced CRISPR/Cas9-mediated precise genome editing by improved design and delivery of gRNA, Cas9 nuclease, and donor DNA. *Journal of biotechnology*. 2017;241:136-46.
26. Kraft K, Geuer S, Will AJ, Chan WL, Paliou C, Borschiwer M, et al. Deletions, inversions, duplications: engineering of structural variants using CRISPR/Cas in mice. *Cell reports*. 2015;10(5):833-9.
27. Canver MC, Bauer DE, Dass A, Yien YY, Chung J, Masuda T, et al. Characterization of genomic deletion efficiency mediated by clustered regularly interspaced short palindromic repeats (CRISPR)/Cas9 nuclease system in mammalian cells. *The Journal of biological chemistry*. 2017;292(6):2556.
28. Ivics Z, Mátés L, Yau TY, Landa V, Zidek V, Bashir S, et al. Germline transgenesis in rodents by pronuclear microinjection of Sleeping Beauty transposons. *Nature protocols*. 2014;9(4):773.
29. Talluri TR, Kumar D, Glage S, Garrels W, Ivics Z, Debowski K, et al. Non-viral reprogramming of fibroblasts into induced pluripotent stem cells by Sleeping Beauty and piggyBac transposons. *Biochemical and biophysical research communications*. 2014;450(1):581-7.
30. Guo Y, Perez AA, Hazelett DJ, Coetzee GA, Rhie SK, Farnham PJ. CRISPR-mediated deletion of prostate cancer risk-associated CTCF loop anchors identifies repressive chromatin loops. *Genome biology*. 2018;19(1):160.
31. Haeussler M, Schönig K, Eckert H, Eschstruth A, Mianné J, Renaud J-B, et al. Evaluation of off-target and on-target scoring algorithms and integration into the guide RNA selection tool CRISPOR. *Genome biology*. 2016;17(1):148.
32. Minematsu T, Sugiyama M, Tohma Y, Tajima A, Kanai Y. Simplified DNA extraction methods for sexing chick embryos. *The Journal of Poultry Science*. 2004;41(2):147-54.

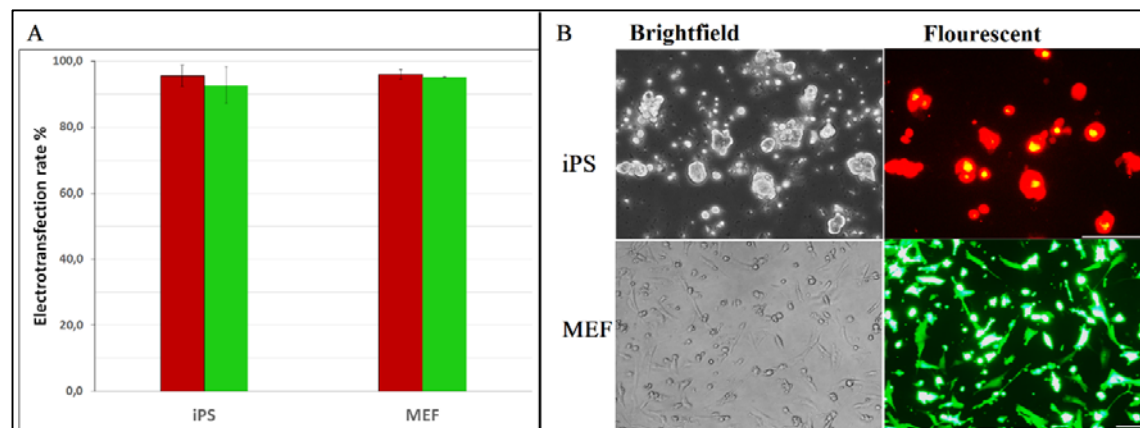

**Figure 1. Electrotransfection efficiency of mouse embryonic fibroblast (EF) and iPS cells.** In each electroporation reaction, 20  $\mu$ g of either pT2-Venus and pT2-mCherry which encode Venus and mCherry proteins, respectively, was pre-mixed with cells and underwent electroporation. A) transfection efficiency and B) fluorescent expression of Venus and mCherry 36 h after electroporation. The following electroporation program was used: square-wave protocol with 300 V voltage, each 10 ms pulse length, 3 number of pulses, 10 s pulse interval, and 4 mm cuvette. Transfected cells for mCherry and Venus are depicted by red and green bars, respectively. Scale bars equal 100  $\mu$ m. Results are means and standard deviation (SD).

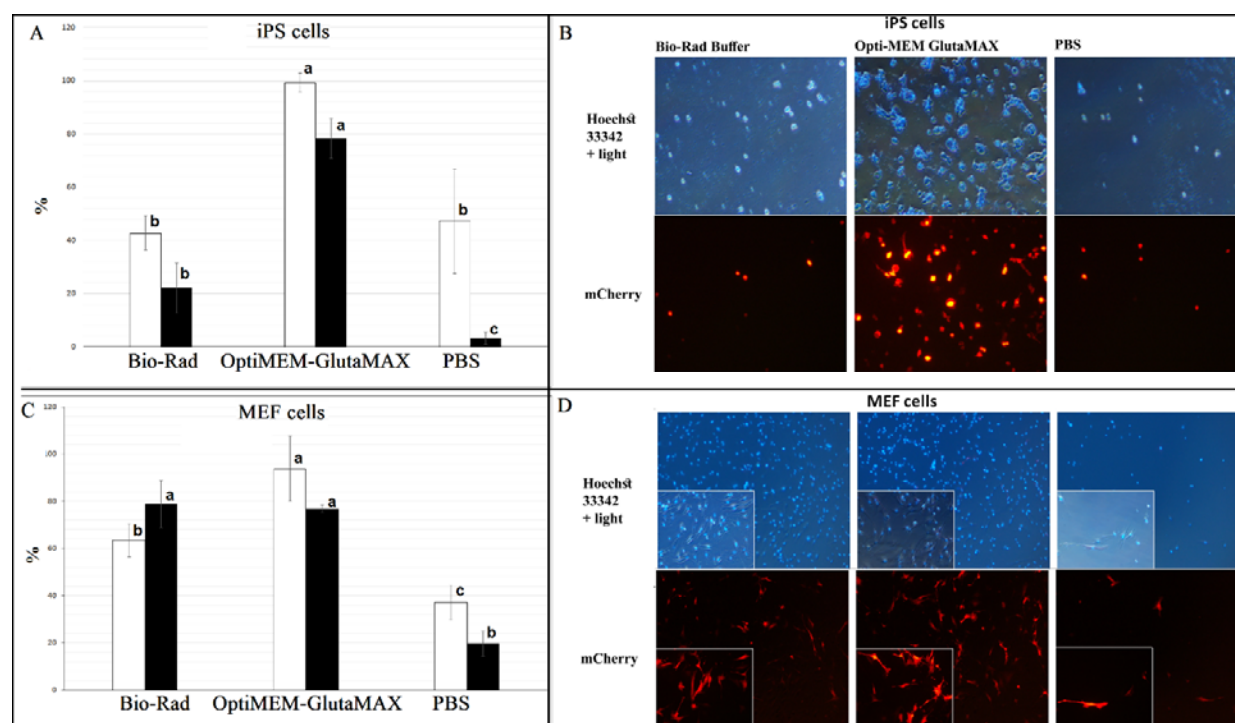

493

494 **Figure 2. Cell electrotransfection and viability rates using Bio-Rad buffer, OptiMEM-**  
495 **GlutaMAX, and PBS.** Electrotransfection efficiency of mouse iPS (A and B) and MEF cells  
496 (C and D) by BioRad electroporator. In each electroporation reaction, 20  $\mu$ g of either pT2-  
497 Venus or pT2-mCherry was pre-mixed with cells and underwent electroporation using the  
498 square-wave protocol with 250 and 300 V (for iPS and MEF cells, respectively), 2 pulses,  
499 each 10 ms length, 10 s interval, and 4 mm cuvette. The expression of Venus/mCherry was  
500 assessed 36 h after electroporation under a fluorescent microscope. White and black bars in A  
501 and C are electrotransfection efficiency and cell viability, respectively. Bars with different  
502 letters with are significantly different (p-value < 0.05). Scale bars equal 100  $\mu$ m. Results are  
503 means and standard deviation (SD).

504

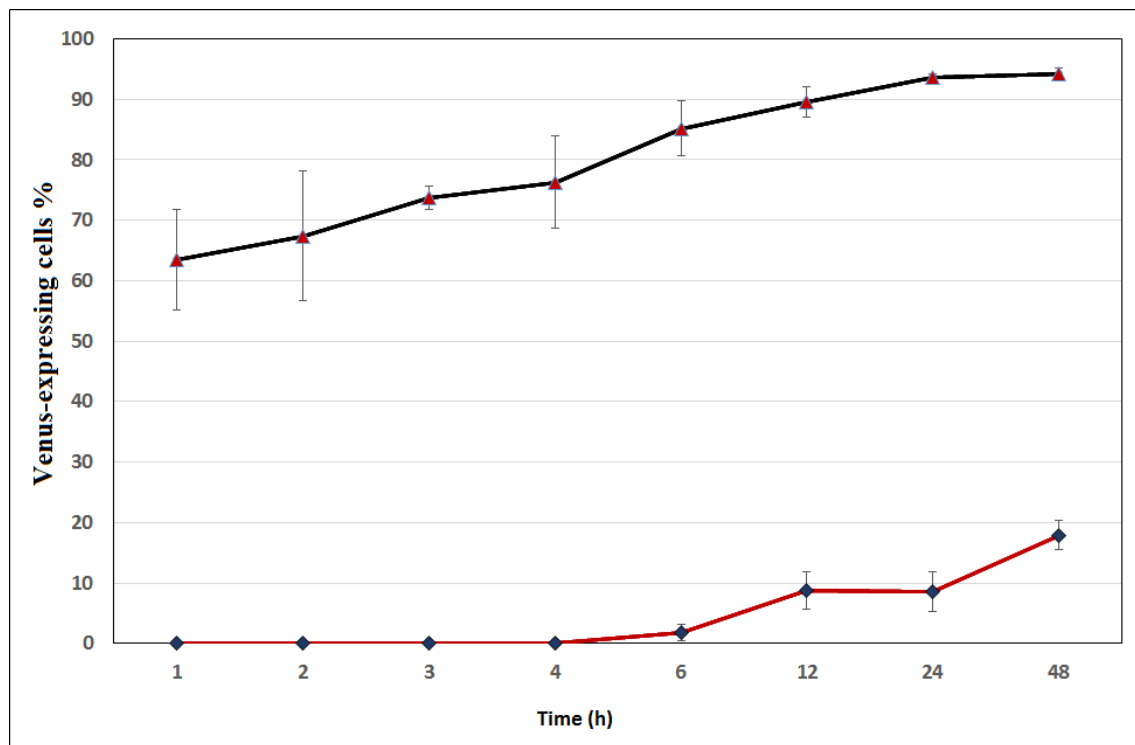

**Figure 3. The onset of transgene expression in electrotransfected and lipofected cells.**  
 Expression of Venus transgene during a period of 1 to 48 h after either the electrotransfection using the optimized electroporation protocol or lipofection of Venus-encoding plasmid using TransIT transfection reagent. The electrotransfection protocol consisted of the square-wave program with 300 V, 2 pulses, each 10 ms length, 10 s interval, and 4 mm cuvette.

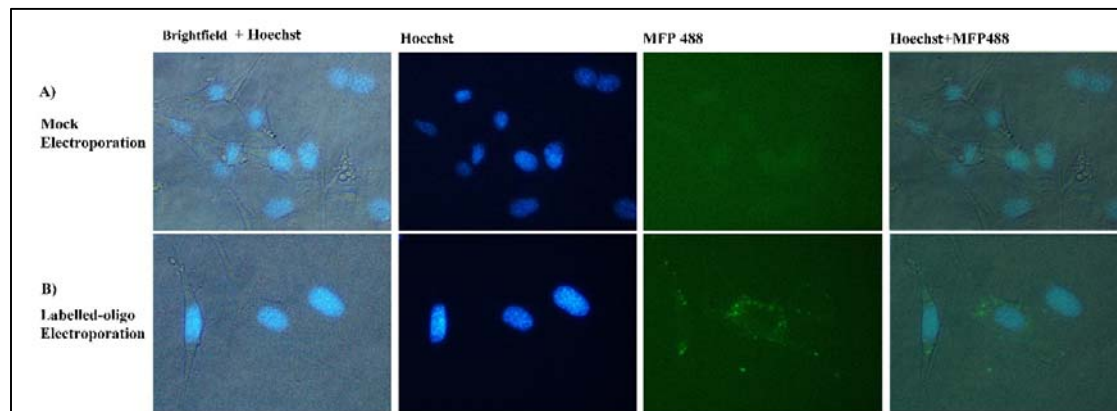

**Figure 4. Tracking of labelled-DNA in electrotransfected cells.** Electrotransfection of MEF cells carrying no-copy of Venus (-/-) with MFP488-labelled oligonucleotides (25 nt). Electrotransfection of non-labelled DNA (A) and MFP488-labelled DNA into MEF cells using the square-wave protocol with 300 V, 2 pulses, each 10 ms length, 10 s interval, and 4 mm cuvette. The labelled-DNA was not detected in the cell nucleus. Scale bar equals 100  $\mu$ m.

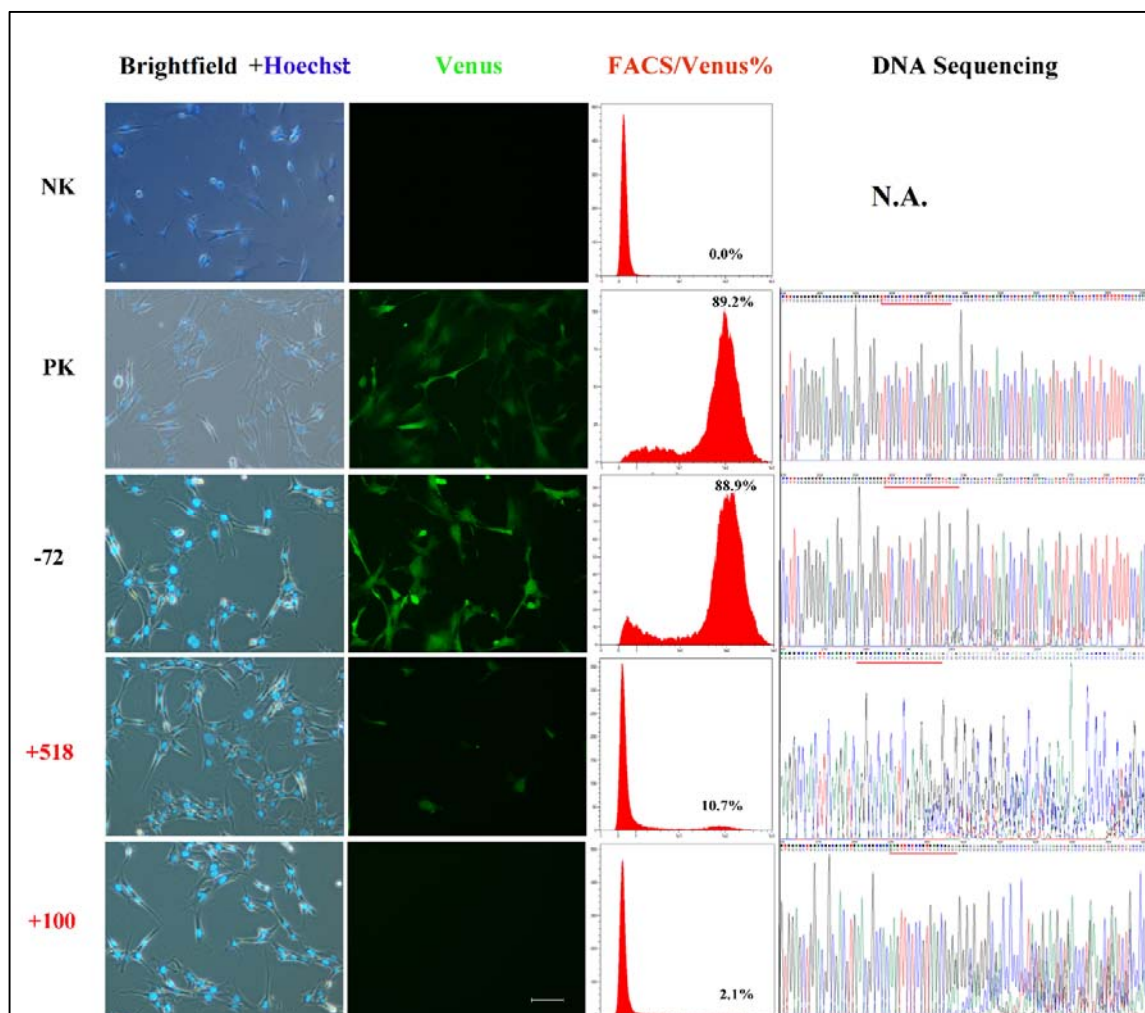

**Figure 5. Knockout of Venus transgene by making indels using gRNA-encoding plasmids.** MEF cells carrying a single-copy of the Venus transgene were electroporated with different gRNA-encoding plasmids (9.1 kb length). Induction of indels using gRNA-72 had no effect on the Venus expression whereas gRNA+100 could completely remove the Venus signal. Electroporated cells were selected against puromycin and screened 10 days after the electroporation. Cells were stained with Hoechst 33342 and the efficiency of Venus KO was assessed. Histograms of the FACS results are shown with the percentage of Venus positive cells is embedded for each group. Results were confirmed by sequencing of the amplified Venus transgene. NK and PK are negative and positive controls, respectively. The following electroporation program was used: square-wave protocol with 300 V voltage, each 10 ms pulse length, 3 number of pulses, 10 s pulse interval, and 4 mm cuvette. Scale bar equals 100  $\mu$ m.



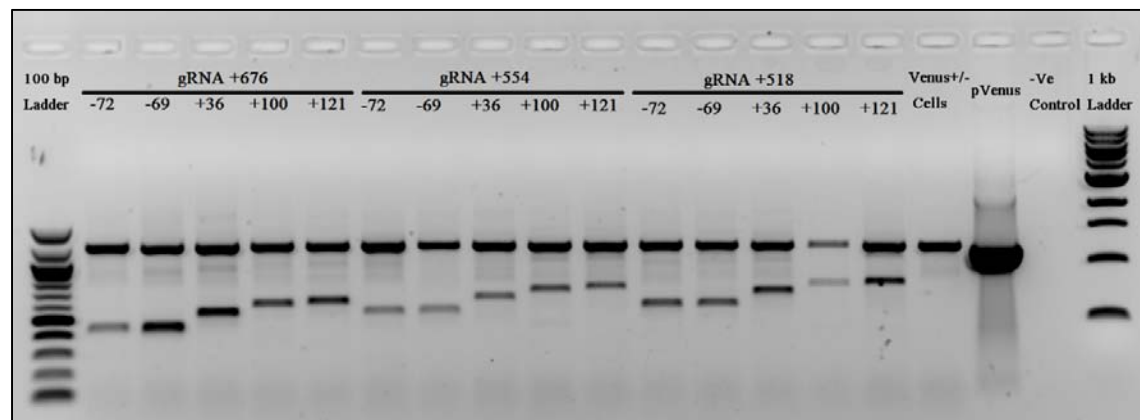

**Figure 6. Targeted deletions of Venus transgene by co-electroporation of two gRNA-encoding plasmids.** End-point PCR showed deletion of 15 different fragments from the original amplicon (1204 bp) using pairwise combination of gRNAs targeting the beginning (-72, -69, +36, +100, and +121) and ending part (+518, +554, and +676) of Venus. Primer Venus Forward and Reverse1 amplified both the shortened and original fragments in the co-electrotransfected groups.

545 **Table S1.** The sequence of gRNAs specific for Venus transgene. These gRNAs were  
546 designed by CRISPOR online software.

| Name | gRNA sequence (5'-3') |
|------|-----------------------|
| -252 | CTTCGCCCCGCGCCCGCTAGA |
| -72  | TTCGGCTTCTGGCGTGTGAC  |
| -69  | GGCTTCTGGCGTGTGACCGG  |
| +36  | CGAGGAGCTGTTCACCGGCG  |
| +100 | AAGTTCTCCGTGAGCGGCGA  |
| +121 | GGCGAGGGCGACGCCACCTA  |
| +518 | AGGCACAACATCGAGGACGG  |
| +554 | AGCACGGGGCCGTCGCCGAT  |
| +676 | CTGGAGTTCGTGACCGCCGC  |

547

548

549 **Table S2.** Primers and probes for amplification and detection of Venus transgene

| Primer/probe Name    | Sequence (5'-3')                                 | Tm   |
|----------------------|--------------------------------------------------|------|
| Late Venus-Forward   | ACGCGTTAAGATACATTGATGAGTT                        | 59.4 |
| Late Venus-Reverse   | CTTGTAAGTTGCCGTCGTCCT                            | 60.0 |
| Early Venus-Forward  | AGGACGACGGCAACTACAAG                             | 60.0 |
| Early Venus-Reverse1 | TGCCTTTTATGGTAATCGTGCG                           | 59.6 |
| Early Venus-Reverse2 | TTGCCTTTTATGGTAATCGTGCG                          | 59.8 |
| Assay-Forward        | CCCTTCAGCTCGATTCTGTT                             | 61.9 |
| Assay-Reverse        | GCAGGAGAGAACCATCTTCTT                            | 61.7 |
| Probe                | 56-FAM-CCTCGGCTC-Zen-<br>TGGTCCTGTAGTTGC-3IABkFQ | 68.0 |

550

551

552

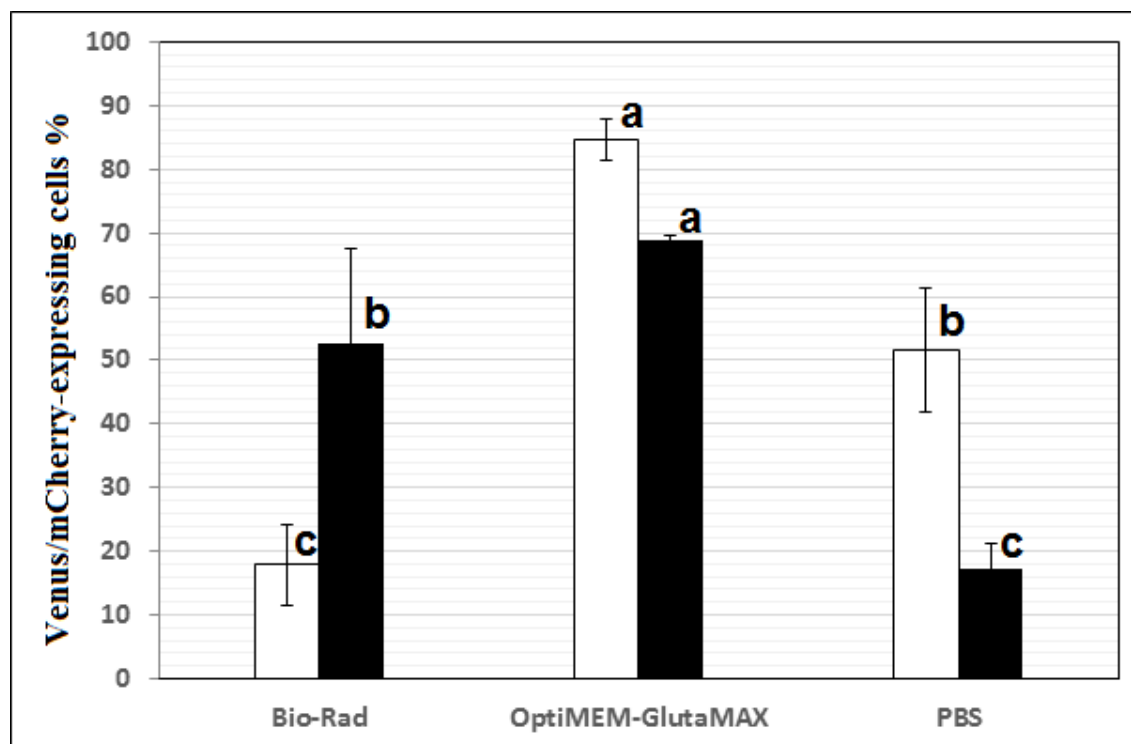

553

554 **Figure S1. Media effect on the electrotransfection efficiency of mouse iPS cells.** Three  
555 media (Bio-Rad buffer, OptiMEM-GlutaMAX, and PBS) were compared at the same  
556 electroporation condition at the early stage of protocol optimization. In each electroporation  
557 reaction, 20 µg of either pT2-Venus or pT2-mCherry was pre-mixed with cells and underwent  
558 electroporation using the square-wave protocol with 200 V voltage, 10 ms pulse length, and 4  
559 mm cuvette. The expression of the fluorescent reporter was assessed 36 h after electroporation  
560 under a fluorescent microscope. White and black bars in A and C are electrotransfection  
561 efficiency and cell viability, respectively. Bars with different letters with are significantly  
562 different (p-value < 0.05). Results are means and standard deviation (SD).

563

564

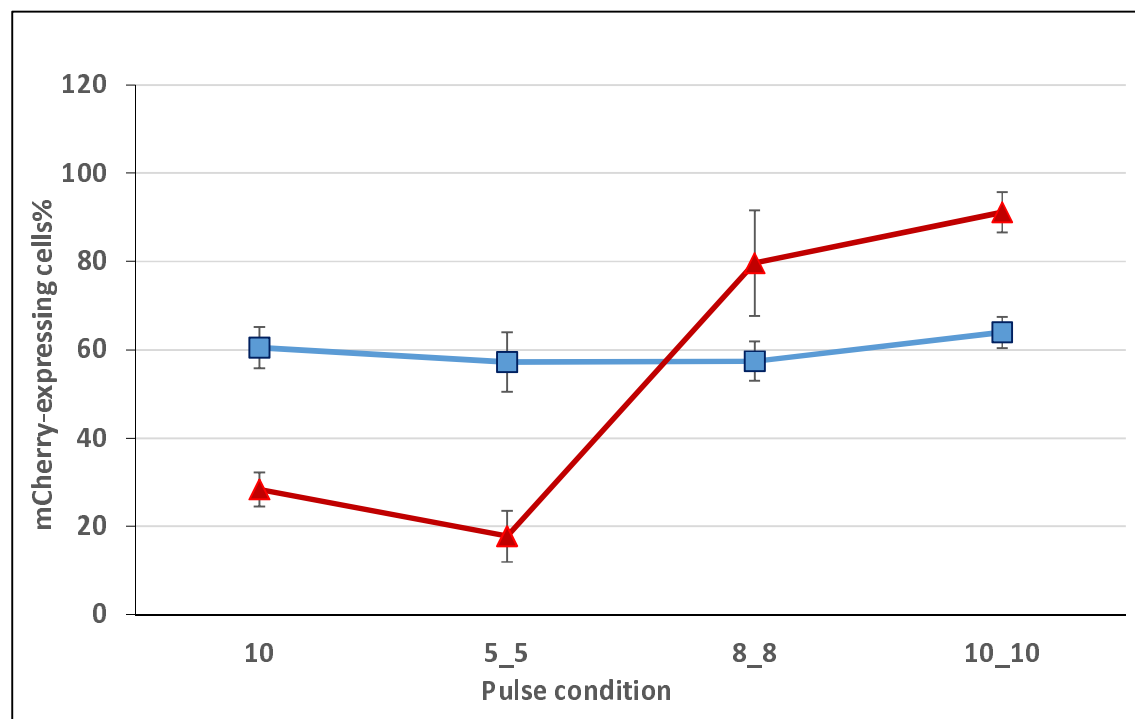

565

566 **Figure S2. The effect of temperature and pulsing condition on electroporation efficiency**  
567 **of mouse iPS cells.** Twenty microgram of a plasmid carrying mCherry transgene under  
568 CAGGS promoter was used for the electrotransfection. A square-wave protocol of 250 V,  
569 either single pulse for 10 ms or double pulses each for 5, 8, or 10 ms with 10 s pulse interval  
570 in 4 mm cuvettes, and 250  $\mu$ l OptiMEM-GlutMAX was applied. Cuvettes were kept either on  
571 ice for 15 min (blue squares) or at room temperature (red triangles) before and after the  
572 pulsing conduction.

573

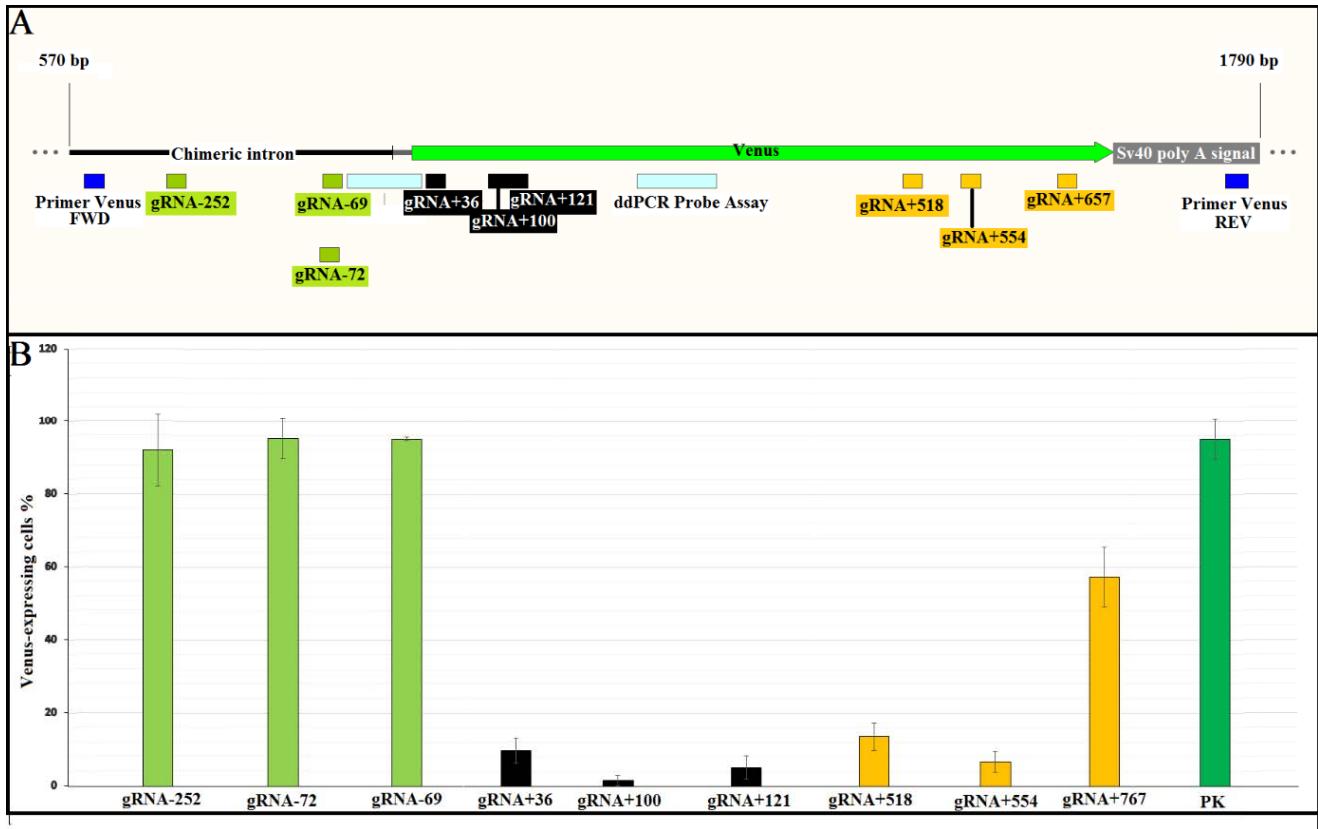

574

575 **Figure S3. Knockout of Venus transgene in MEF cells carrying a single-copy of Venus.**

576 A) schematic presentation of gRNA location on the Venus transgene. Nine gRNAs were  
577 designed to target upstream region (252, 72, and 69), early encoding region (36, 100, and  
578 121), and late encoding region of the Venus transgene (518, 554, and 676) which are depicted  
579 with white-green, black, and yellow bars, respectively. Assays for Digital PCR are depicted  
580 in white blue boxes. B) Efficiency of different gRNAs for making Venus knockout. Cells  
581 were treated with puromycin and were screened for the Venus transgene under a fluorescent  
582 microscope 10 days after the electroporation. PK is the positive control without handling  
583 which are MEF cells carrying a single-copy of the Venus transgene.

584

585

586

587

588

589

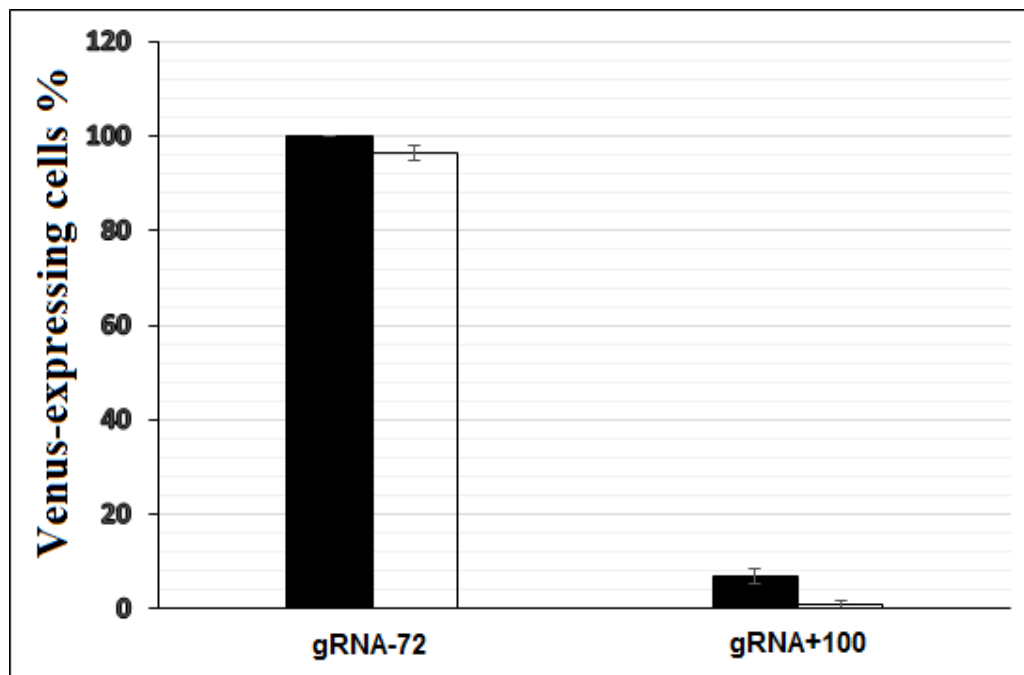

**Figure S4. Knockout efficiency of Venus transgene in MEF cells treated with or without puromycin.** Two plasmids encoding the Cas9 protein and gRNAs, 72 and 100, which targeted different positions of the transgene promoter and encoding gene were electroporated into the MEF cells carrying a single-copy of Venus using the optimized protocol. Cells were treated one-day post-transfection either with (white bars) or without Puromycin (black bars). Cells were screened for the Venus transgene under a fluorescent microscope 10 days after the electroporation.

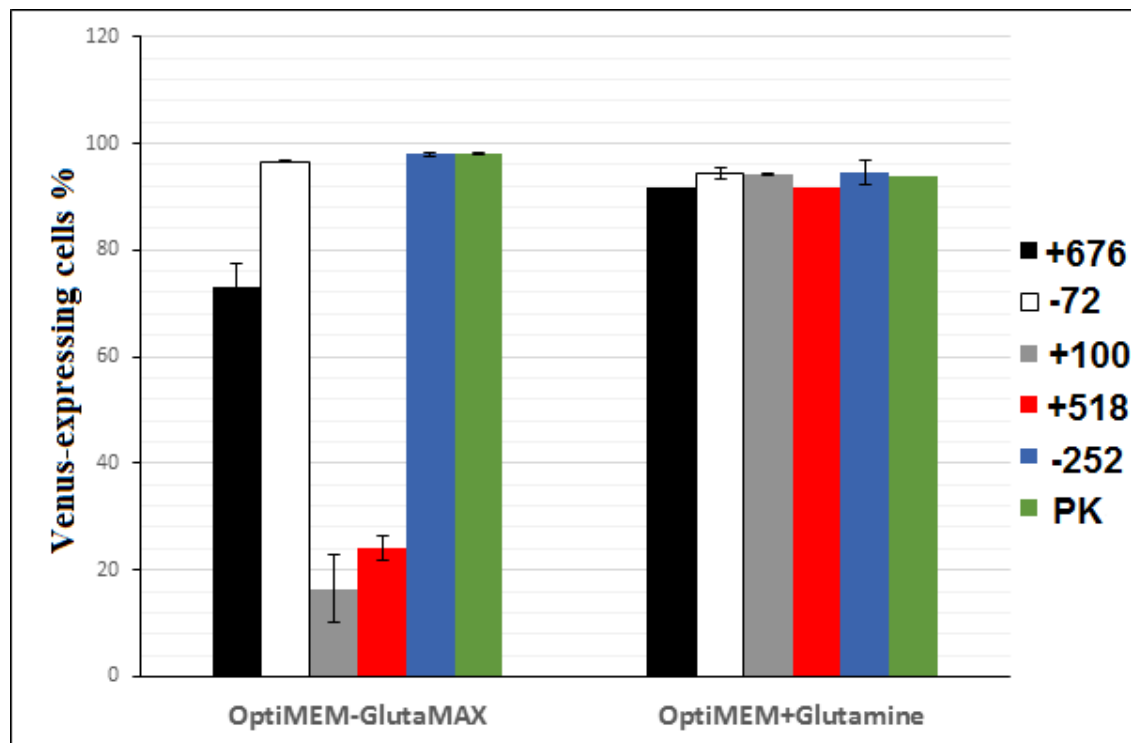

**Figure S5. Comparison of OptiMEM-GlutaMAX vs. standard OptiMEM (+Glutamine) for making Venus knockout.** MEF cells carrying a single-copy of Venus were electrotransfected using various gRNA-encoding plasmids (gRNA+676, -72, +100, +518, and -252). Cells were screened for the Venus transgene under a fluorescent microscope 10 days after the electroporation. PK is the positive control without handling which are MEF cells carrying a single-copy of the Venus transgene.



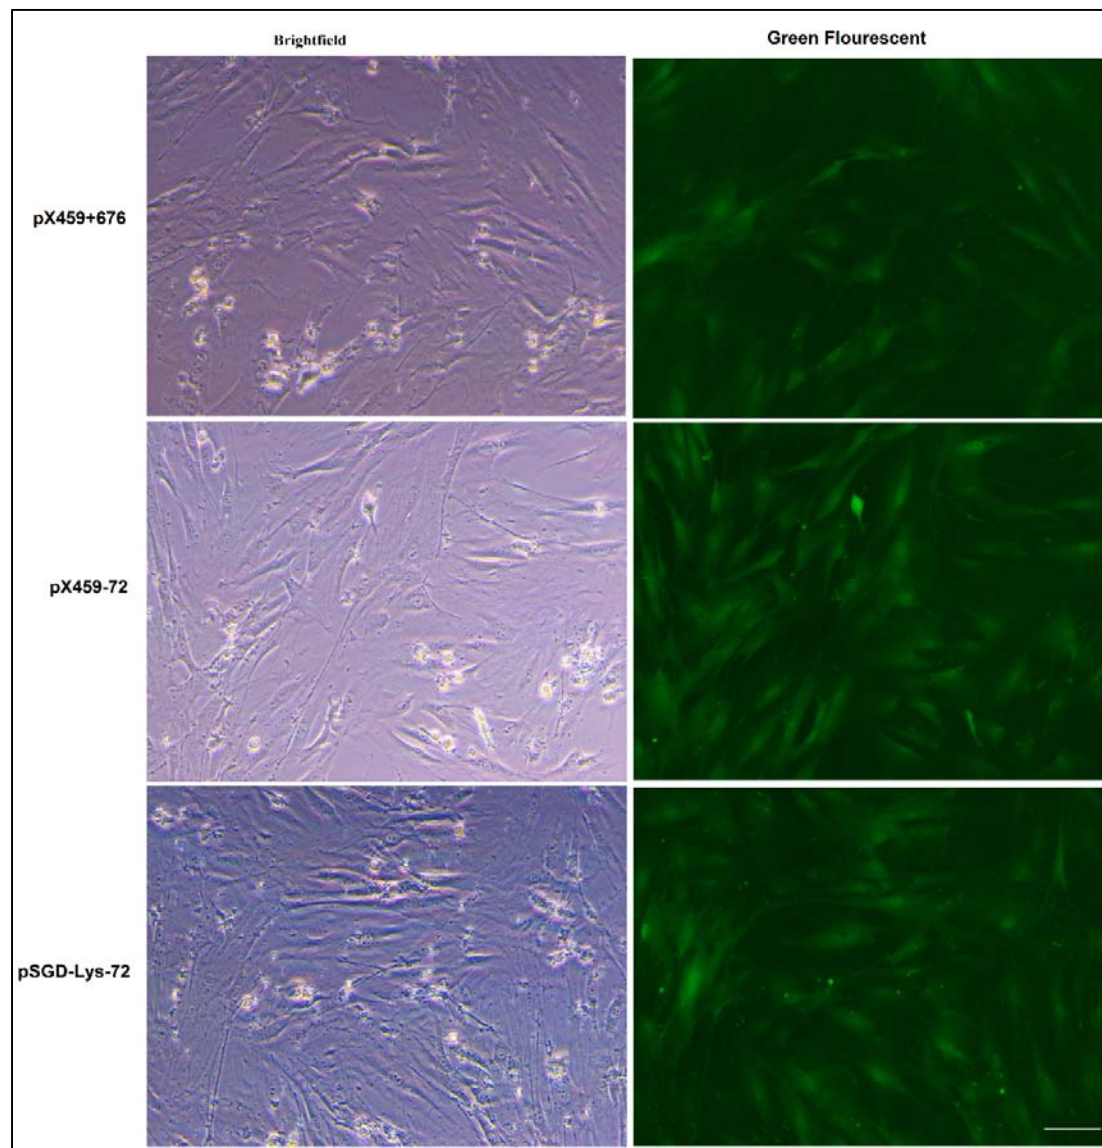

**Figure S6. Viability of electrotransfected cells using large plasmids.** Large plasmids ranging from 9.2 kb (pX459-72 and pX459+676) to 13.5 kb (pSGD-Lys-72) were used for electrotransfection of MEF cells carrying a single-copy of Venus. All plasmids encoded puromycin antibiotic. Cells from all groups underwent a one-day puromycin selection 16 h following the electroporation. The expression of Venus transgene was not affected by the electroporation during the first 40 h of cell culture. Scale bar equals 100  $\mu$ m.

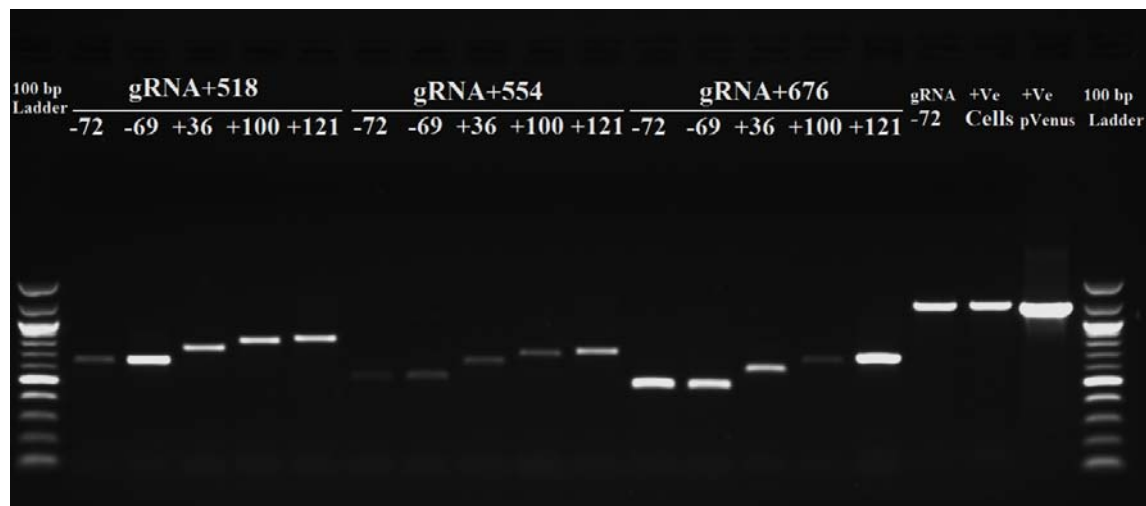

**Figure S7. Targeted deletions in Venus transgene by co-electroporation of two gRNA-encoding plasmids.** End-point PCR using primer Venus Forward and Venus Reverse showed deletion of five different fragments from the original amplicon (1204 bp) using pairwise combination of gRNAs targeting early (-72, -69, +36, +100, and +121) and late part (+518, +554, and +676) of Venus. Only the shortened fragments have been amplified using this primer set in the co-electrotransfected group.

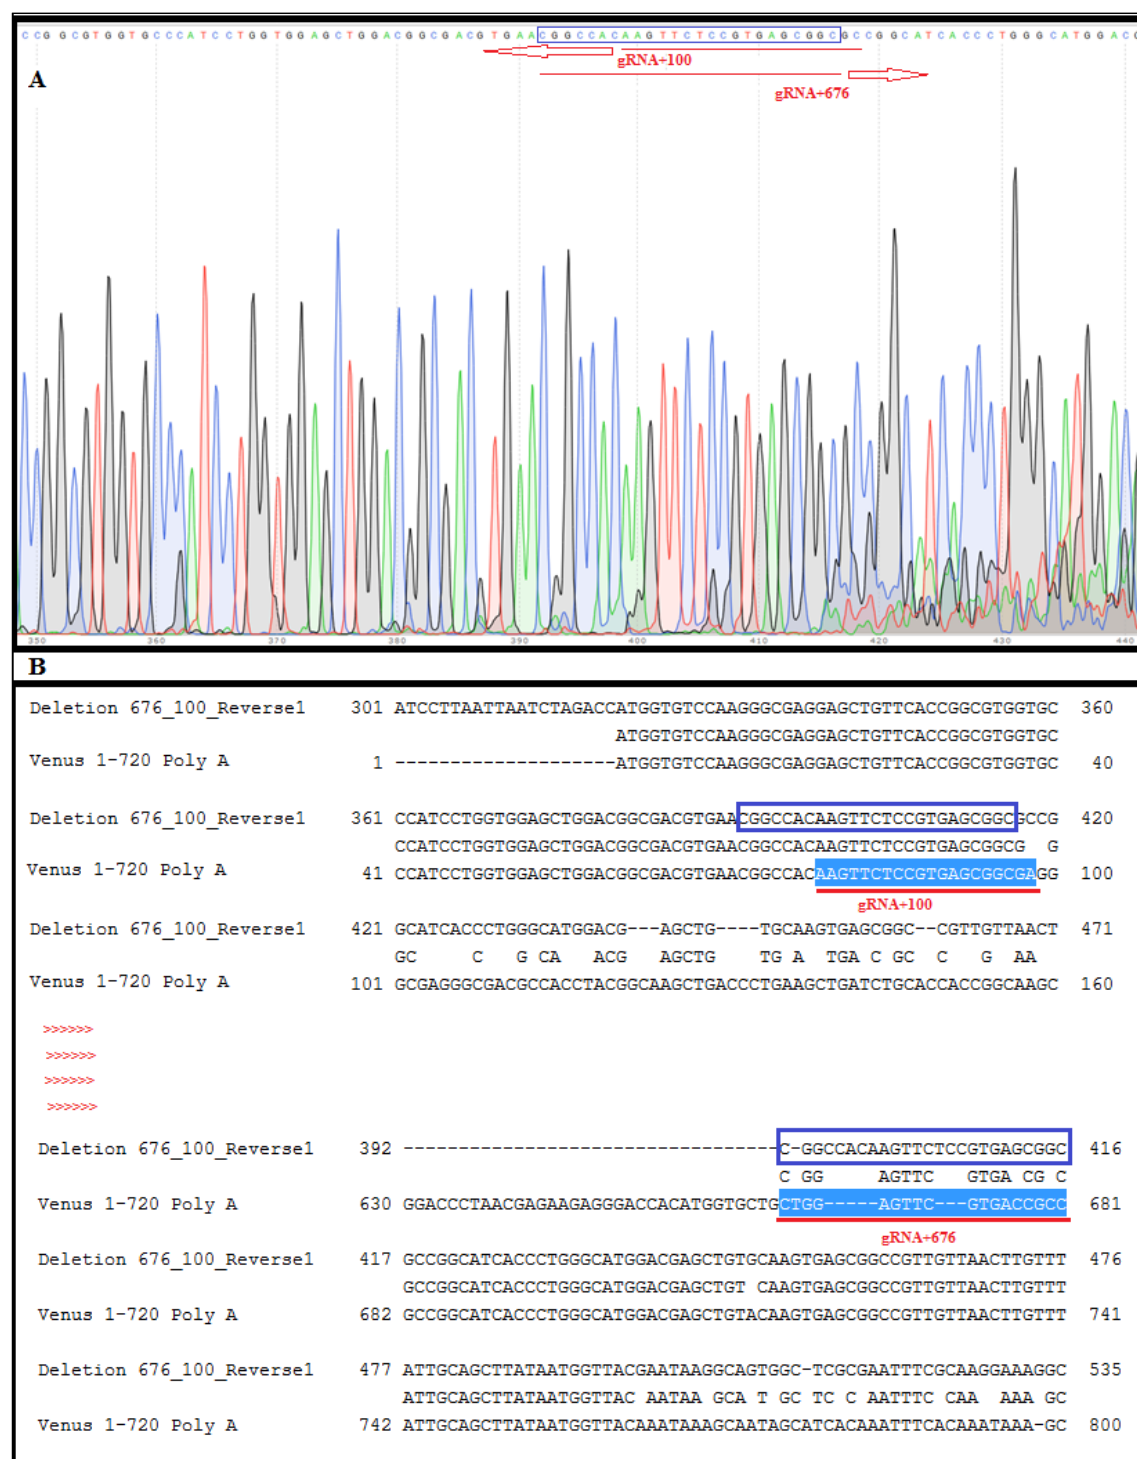

**Figure S8. Sequencing results of Venus transgene which underwent a targeted deletion.** MEF cells carrying a single-copy of Venus were co-electrotransfected with two gRNA-encoding plasmids. A) The amplified DNA from cells which were treated with gRNA+100 and gRNA+676 were sequenced. B) Alignment of the sequenced DNA with the Venus sequence. Blue box indicates a common sequence which corresponded to both gRNAs. The gRNAs and their following sequences are depicted with red color.
